# Supplementary material for: Donanemab for Alzheimer’s Disease: A Systematic Review of Clinical Trials
Source: MDPI journal article supplement (doi:10.3390/healthcare11010032), 2022-12-22
Supplement: s1 [file s1]

## Supplementary Materials

### Supplementary S1: Keyword Strings.

|                                                     |                                                                                                                                                                                                                      |
|-----------------------------------------------------|----------------------------------------------------------------------------------------------------------------------------------------------------------------------------------------------------------------------|
| Search: <b>(chronic urticaria) AND (Omalizumab)</b> | ("chronic urticaria"[MeSH Terms] OR ("chronic"[All Fields] AND "urticaria"[All Fields]) OR "chronic urticaria"[All Fields]) AND ("omalizumab"[MeSH Terms] OR "omalizumab"[All Fields] OR "omalizumab s"[All Fields]) |
| <b>chronic urticaria:</b>                           | "chronic urticaria"[MeSH Terms] OR ("chronic"[All Fields] AND "urticaria"[All Fields]) OR "chronicurticaria"[All Fields]                                                                                             |
| <b>Omalizumab:</b>                                  | "omalizumab"[MeSH Terms] OR "omalizumab"[All Fields] OR "omalizumab's"[All Fields]                                                                                                                                   |

## Supplementary S2: Data Sheet.

| ID and Name             | Author, Year | Dosage and TimePeriod                                                                               | Inclusion                                                                                                                                                                        | Mean Age    | Females (IG vs CG)              | Race (IG vs CG)                                                                                                          | Weekly Itch Score (IG vs CG)                                                                                                                                             | Weekly Wheal Score(IG vs CG)                                                                                                                                         | Responders (IG vs CG)                                                                          | UAS7 (IG vs CG)                                                                                                                                                                       |
|-------------------------|--------------|-----------------------------------------------------------------------------------------------------|----------------------------------------------------------------------------------------------------------------------------------------------------------------------------------|-------------|---------------------------------|--------------------------------------------------------------------------------------------------------------------------|--------------------------------------------------------------------------------------------------------------------------------------------------------------------------|----------------------------------------------------------------------------------------------------------------------------------------------------------------------|------------------------------------------------------------------------------------------------|---------------------------------------------------------------------------------------------------------------------------------------------------------------------------------------|
| NCT00481676, XCUISITE   | Maurer, 2011 | Omalizumab was dosed at 75 to 375 mg, subcutaneously every 2 or 4 weeks ending at 24 weeks          | Males/Females (18-70 years old) with CU with IgE autoantibodies against thyroperoxidase who had persistent symptoms (wheals and pruritus) despite standard antihistamine therapy | 40.5        | 19/27 (70.4%) vs. 19/22 (86.4%) | All White                                                                                                                | <b>150 mg:</b> -5.9 (4.43) N=8 vs. -3.57 (4.95) N=22<br><b>300 mg:</b> -11.19 (6.46) N=8 vs. -3.57 (4.95) N=22                                                           | <b>150 mg:</b> -7.19 (5.39) N=8 vs. -3.36 (4.34) N=22<br><b>300 mg:</b> -8.53 (7.01) N=8 vs. -3.36 (4.34) N=22                                                       | <b>150 mg:</b> 1/7 vs. 1/22 <b>300 mg:</b> 5/7 vs. 1/22                                        | <b>75-375 mg:</b> -17.8 (10.52) N=27 vs. -5.8 (11.52) N=22                                                                                                                            |
| NCT01292473, ASTERIA I  | Maurer, 2013 | Omalizumab 75 mg or 150 mg or 300 mg, subcutaneously every 4 weeks ending at 12 weeks               | Patients between the ages of 12 and 75 years with moderate-to-severe CIU who remained symptomatic despite H1-antihistamine therapy (licensed doses)                              | 42.5 ± 13.7 | 189/243 (77.8%) vs. 55/79 (70%) | White: 202/243 (83.1%) vs. 70/79 (89%)<br>Non-White: 31/243 (12.8%) vs. 6/79 (8%)<br>NA: 10/243 (4.1%) vs. 3/79 (4%)     | <b>75 mg:</b> -6.46 (6.14) N=70 vs. -3.63 (5.22) N=80<br><b>150 mg:</b> -6.66 (6.28) N=87 vs. -3.63 (5.22) N=80<br><b>300 mg:</b> -9.4 (5.73) N=81 vs. -3.63 (5.22) N=80 | <b>75 mg:</b> -7.36 (7.52) N=70 vs. -4.37 (6.6) N=80<br><b>150 mg:</b> -9.8 (7.3) N=82 vs. -5.2 (6.6) N=79<br><b>300 mg:</b> -11.35 (7.25) N=81 vs. -4.37 (6.6) N=80 | <b>75 mg:</b> 9/77 vs. 7/80 <b>150 mg:</b> 12/80 vs. 7/80<br><b>300 mg:</b> 29/81 vs. 7/80     | <b>75 mg:</b> -13.08 (12.67) N=82 vs. -10.36 (11.61) N=79<br><b>150 mg:</b> -17.89 (13.23) N=82 vs. -10.36 (11.61) N=79<br><b>300 mg:</b> -21.74 (12.78) N=79 vs. -10.36 (11.61) N=79 |
| NCT01287117, ASTERIA II | Saini, 2015  | Omalizumab 75 mg or 150 mg or 300 mg subcutaneously every 4 weeks during a 24 week treatment period | Patients aged 12–75 years with CIU/CSU who remained symptomatic despite treatment with approved doses of H1 antihistamines                                                       | 41.15       | 179/238 (75.2%) vs. 52/80 (65%) | White: 199/238 (83.6%) vs. 64/80 (80%)<br>Black: 23/238 (9.7%) vs. 10/80 (12.5%)<br>Other: 16/238 (6.7%) vs. 6/80 (7.5%) | <b>75 mg:</b> -5.9 (6.5) N=82 vs. -5.1 (5.6) N=79<br><b>150 mg:</b> -8.1 (6.4) N=82 vs. -5.1 (5.6) N=79<br><b>300 mg:</b> -9.8 (6) N=79 vs. -5.1 (5.6) N=79              | <b>75 mg:</b> -7.2 (7) N=82 vs. -5.2 (6.6) N=79<br><b>150 mg:</b> -9.8 (7.3) N=82 vs. -5.2 (6.6) N=79<br><b>300 mg:</b> -12 (7.6) N=79 vs. -5.2 (6.6) N=79           | <b>75 mg:</b> 13/82 vs. 4/79<br><b>150 mg:</b> 18/82 vs. 4/79<br><b>300 mg:</b> 35/79 vs. 4/79 | <b>75 mg:</b> -13.82 (13.26) N=77 vs. -8.01 (11.47) N=80<br><b>150 mg:</b> -14.44 (12.95) N=80 vs. -8.01 (11.47) N=80<br><b>300 mg:</b> -20.75 (12.17) N=81 vs. -8.01 (11.47) N=80    |

|                      |                |                                                                                           |                                                                                                                                                                                                                                                                                                  |                 |                                   |                                                                                                                 |                                                        |                                                      |                                |                                                           |
|----------------------|----------------|-------------------------------------------------------------------------------------------|--------------------------------------------------------------------------------------------------------------------------------------------------------------------------------------------------------------------------------------------------------------------------------------------------|-----------------|-----------------------------------|-----------------------------------------------------------------------------------------------------------------|--------------------------------------------------------|------------------------------------------------------|--------------------------------|-----------------------------------------------------------|
| NCT01264939, GLACIAL | Kaplan, 2013   | Omalizumab 300 mg subcutaneously every 4 weeks during a 24 week treatment period          | Patients aged 12 to 75 years old; CIU/CSU for 6 months or longer; itch and hives for more than 6 consecutive weeks before enrollment despite therapy with H1-antihistamines plus H2-antihistamines, LTRAs, or both; UAS7 $\geq$ 16                                                               | 43.1 $\pm$ 14.1 | 186/252 (73.8%) vs. 55/83 (66.3%) | White: 223/252 (88.5%) vs. 75/83 (90.4%)                                                                        | <b>300 mg:</b> -10.5 (11.05) N=252 vs. -4.5 (7.7) N=83 | <b>300 mg:</b> -8.6 (9.82) N=252 vs. -4 (7.42) N=83  | <b>300 mg:</b> 85/252 vs. 4/83 | <b>300 mg:</b> -19.01 (13.15) N=252 vs. -8.5 (11.71) N=83 |
| NCT01599637, MOA     | Metz, 2019     | 300 mg, Omalizumab administered subcutaneously every 4 weeks through 85 days              | CSU patients (18-75 years) who remained symptomatic despite H-1 antihistamine treatment at approved doses, characterized by the re-occurrence of itch and hives for > 6 weeks before baseline; UAS7 $\geq$ 16; a CSU diagnosis > 6 months; be on an approved dose of an H1-antihistamine for CSU | 39.3            | 18/20 (90%) vs. 8/10 (80%)        | All White                                                                                                       | <b>300 mg:</b> -11.5 (4.54) N=17 vs. -3.1 (6.04) N=8   | <b>300 mg:</b> -11.6 (5.68) N=17 vs. -3.3 (8.15) N=8 | <b>300 mg:</b> 9/25 vs. 0/21   | <b>300 mg:</b> -23.1 (12.94) N=17 vs. -8.1 (14.45) N=8    |
| NCT01723072, X-ACT   | Staubach, 2015 | 300 mg, Omalizumab once a month via subcutaneous injection for a 28-week treatment period | Patients with CSU aged 18–75 years, with wheals; > 4 occurrences of angioedema in the last 6 months; symptomatic despite high-dose sg H1-antihistamine treatment (2-4 times                                                                                                                      | 42.9 $\pm$ 12.3 | 30/44 (68.2%) vs. 33/47 (70.2%)   | White: 42/44 (95.5%)<br>46/47 (97.9%)<br>Asian: 1/44 (2.3%) vs. 1/47 (2.1%)<br>Other: 1/44 (2.3%) vs. 0/47 (0%) | <b>300 mg:</b> -8.3 (7.58) N=44 vs. -2.2 (8.99) N=47   | <b>300 mg:</b> -8.1 (9.32) N=44 vs. -2.1 (9.43) N=47 | <b>300 mg:</b> 85/252 vs. 4/83 | <b>300 mg:</b> -16.8 (14.8) N=44 vs. -6.5 (13.4) N=47     |

|                       |                        |                                                                                        |                                                                                                                                                                                                                                                                   |           |                                   |                                                                                                                                                                                                    |                                                                                                                                                                          |                                                                                                                                                                        |                                                                      |                                                                                                                                                                                |
|-----------------------|------------------------|----------------------------------------------------------------------------------------|-------------------------------------------------------------------------------------------------------------------------------------------------------------------------------------------------------------------------------------------------------------------|-----------|-----------------------------------|----------------------------------------------------------------------------------------------------------------------------------------------------------------------------------------------------|--------------------------------------------------------------------------------------------------------------------------------------------------------------------------|------------------------------------------------------------------------------------------------------------------------------------------------------------------------|----------------------------------------------------------------------|--------------------------------------------------------------------------------------------------------------------------------------------------------------------------------|
|                       |                        |                                                                                        | the approved dose)                                                                                                                                                                                                                                                |           |                                   |                                                                                                                                                                                                    |                                                                                                                                                                          |                                                                                                                                                                        |                                                                      |                                                                                                                                                                                |
| NCT00130234, MYSTIQUE | Saini, 2011            | A single subcutaneous dose of 75, 300, or 600 mg of Omalizumab for a total of 24 weeks | Patients aged 12 to 75 years with a history of CIU (>3 months) without a clearly defined cause; moderate-to-severe CIU (pruritus and hives for >3 days in a 7-day period for >6 consecutive weeks) despite treatment with an approved dose of an H1-antihistamine | 40.8      | 44/69 (63.8%) vs. 17/21 (81%)     | White: 57/69 (82.6%) vs. 18/21 (85.7%)<br>Black/African American: 6/69 (8.7%) vs. 2/21 (9.5%)<br>Asian: 4/69 (5.8%) vs. 1/21 (4.8%)<br>American Indian or Alaska Native: 2/69 (2.9%) vs. 0/21 (0%) | <b>75 mg:</b> -4.5 (5.84) N=23 vs. -3.45 (5.22) N=21<br><b>300 mg:</b> -9.22 (5.98) N=25 vs. -3.45 (5.22) N=21<br><b>600 mg:</b> -6.46 (5.63) N=21 vs. -3.45 (5.22) N=21 | <b>75 mg:</b> -5.28 (6.91) N=23 vs. -3.46 (5.17) N=21<br><b>300 mg:</b> -10.71 (6.75) N=25 vs. -3.46 (5.17) N=21<br><b>600 mg:</b> -8.1 (6) N=21 vs. -3.46 (5.17) N=21 | NR                                                                   | <b>75 mg:</b> -9.79 (11.75) N=23 vs. -6.91 (9.84) N=21<br><b>300 mg:</b> -19.93 (12.38) N=25 vs. -6.91 (9.84) N=21<br><b>600 mg:</b> -14.56 (10.17) N=21 vs. -6.91 (9.84) N=21 |
| NCT01713725           | Serrano-Candelas, 2017 | Omalizumab 300 mg, Subcutaneously for 14 weeks, with 5 total doses                     | CSU patients being treated with Omalizumab, representing a median disease duration of 6.7 years                                                                                                                                                                   | 44 ± 12.2 | 8/17 (47.1%) vs. 14/22 (63.6%)    | NR                                                                                                                                                                                                 | <b>300 mg:</b> -1.36 (1.62) N=17 vs. -1 (1.59) N=17                                                                                                                      | <b>300 mg:</b> -1.36 (1.62) N=17 vs. -0.72 (0.79) N=17                                                                                                                 | NR                                                                   | <b>300 mg:</b> -2.4 (2.5) N=17 vs. -1.2 (2.6) N=17                                                                                                                             |
| NCT03328897           | Bi, 2021               | Omalizumab 150 or 300 mg, injected, every 4 weeks                                      | Children with CU with a duration of over 6 weeks; the onset of symptoms were at least twice or 2 days per week, with the duration of each attack within the last 24 hours                                                                                         | 8.6       | 62/108 (57.4%) vs. 55/105 (52.4%) | NR                                                                                                                                                                                                 | <b>150 mg:</b> -9.66 (0.424) N=167 vs. -5.87 (0.604) N=83<br><b>300 mg:</b> -10.11 (0.430) N=167 vs. -5.87 (0.604) N=83                                                  | NR                                                                                                                                                                     | <b>150 mg:</b> 144/167 vs. 59/83<br><b>300 mg:</b> 142/167 vs. 59/83 | <b>150 mg:</b> -20.74 (0.882) N=167 vs. -11.62 (1.258) N=83<br><b>300 mg:</b> -21.82 (0.895) N=167 vs. -11.62 (1.258) N=83                                                     |
| NCT02329223, POLARIS  | Hide, 2017             | Omalizumab 150 or 300 mg subcutaneously every 4 weeks for 12 weeks                     | Males and females, aged 12 to 75 years, with a CSU diagnosis for 6 months refractory to conventional                                                                                                                                                              | 43.57     | 83/144 (57.6%) vs. 48/74 (64.9%)  | Japanese: 69/144 (47.9%) vs. 36/74 (48.6%)<br>Korean: 75/144                                                                                                                                       | <b>150 mg:</b> -8.8 (0.591) N=70 vs. -6.51 (0.581) N=74<br><b>300 mg:</b> -10.22 (0.571)                                                                                 | <b>150 mg:</b> -9.3 (0.709) N=70 vs. -6.27 (0.696) N=74<br><b>300 mg:</b> -10.71 (0.684) N=73 vs. -                                                                    | <b>150 mg:</b> 13/70 vs. 3/74<br><b>300 mg:</b> 26/73 vs. 3/74       | <b>150 mg:</b> -18.79 (1.288) N=70 vs. 13.9 (1.265) N=74<br><b>300 mg:</b> -22.44 (1.243) N=73 vs. -13.9 (1.265) N=74                                                          |

|  |  |  |                               |  |  |                                 |                                |                      |  |  |
|--|--|--|-------------------------------|--|--|---------------------------------|--------------------------------|----------------------|--|--|
|  |  |  | H1AH at time of randomization |  |  | (52.1%) vs.<br>38/74<br>(51.4%) | N=73 vs. -6.51<br>(0.581) N=74 | 6.27 (0.696)<br>N=74 |  |  |
|--|--|--|-------------------------------|--|--|---------------------------------|--------------------------------|----------------------|--|--|
